# Supplementary material for: Thermography for disease detection in livestock: A scoping review
Source: Front Vet Sci. 2022 Aug 9;9:965622. doi: 10.3389/fvets.2022.965622 (PMC9395652; doi:10.3389/fvets.2022.965622)
Supplement: Supplementary file 1 [file Data_Sheet_1.docx]

Supplementary Material

# Supplementary Data

Supporting calculations for Table 5

Emissivity formula:

Where,

E = energy flux (also called the radiant emittance),
ε = emissivity, 
 = Stefan–Boltzmann constant (5.67x10-8 W m^-2 K^-4) and
T = Temperature (in kelvin).

or equivalently:

Error propagation formula:

applied to the temperature-emissivity equation:

where:

Assuming , i.e. ignoring the uncertaintity in the measured emission, we have:

For a given temperature, 308.15K (35oC), and considering the Stefan Boltzman constant , we can obtain the error in temperature for different choices of . See Table 5.
